# Supplementary material for: Room temperature magnetoelectric multiferroic behavior of 50 mol% Fe substituted PbTiO3 (PbTi0.5Fe0.5O3−δ) nanoparticles
Source: Royal Society of Chemistry journal article supplement (doi:10.1039/c6ra14681c), 2016-01-01
Supplement: c6ra14681c1.pdf [file c6ra14681c1.pdf]

Supplementary Information

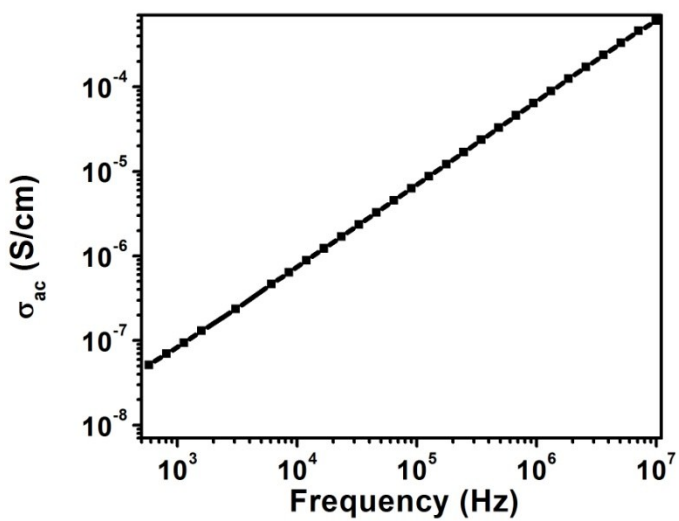

**Supplementary Information Figure.1.** Frequency dependence of AC electrical conductivity of  $\text{PbTi}_{0.5}\text{Fe}_{0.5}\text{O}_{3-\delta}$  nanoparticles at room temperature.
